# Supplementary material for: Decreased parasite burden and altered host response in children with sickle cell anemia and severe anemia with malaria
Source: PubMed Central journal article supplement — Blood Adv. 2021 Nov 18;5(22):4710–20. doi: 10.1182/bloodadvances.2021004704 (PMC8759120; doi:10.1182/bloodadvances.2021004704), 2021-11-18
Supplement: advancesADV2021004704-suppl1.pdf [file advancesADV2021004704-suppl1.pdf]

**Supplemental Figure 1.** Distribution of peripheral parasite density and PfHRP-2 concentrations by beta globin genotype.

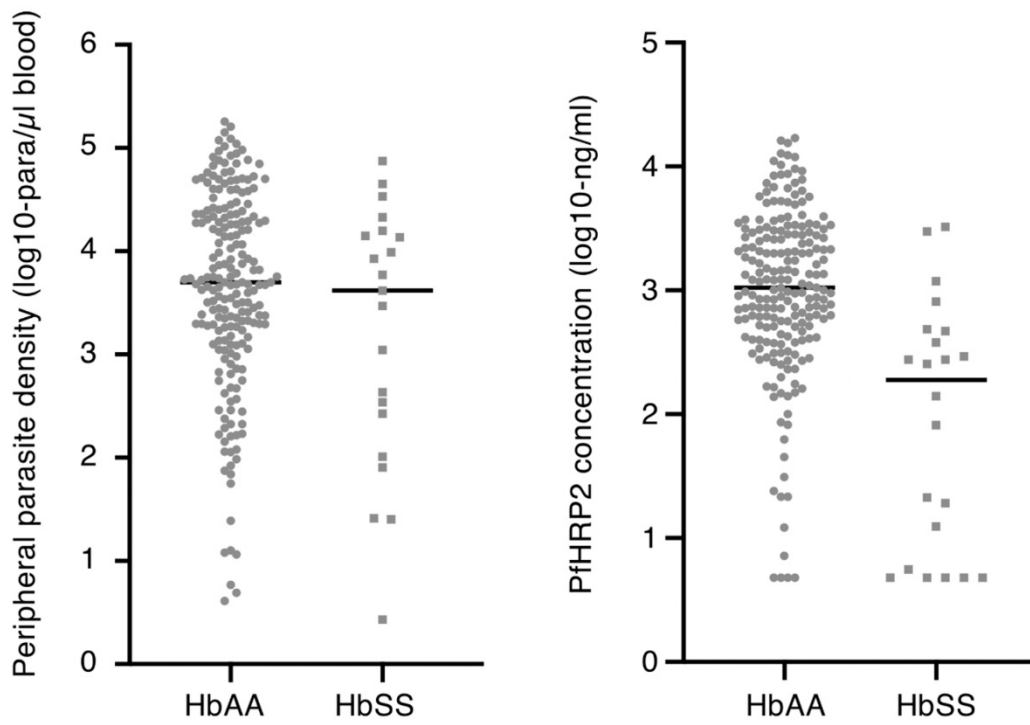

Median is denoted with a black bar.

**Supplemental Table 1.** Demographic characteristics of children in the CM-R01 parent study.

|                                             | SMA<br>(n = 232) | CM<br>(n = 267) | Community<br>Controls<br>(n = 216) |
|---------------------------------------------|------------------|-----------------|------------------------------------|
| <b>Baseline demographic characteristics</b> |                  |                 |                                    |
| Number of male patients (%)                 | 140 (60.3)       | 159 (59.6)      | 104 (48.1)                         |
| Median age (IQR), years                     | 2.8 (2.1, 4.4)   | 3.5 (2.5, 4.9)  | 3.6 (2.7, 4.7)                     |
| <b>Baseline clinical characteristics</b>    |                  |                 |                                    |
| Number with HbAA genotype (%)               | 208 (89.6)       | 264 (98.9)      | 175 (81.0)                         |
| Number with HbAS genotype (%)               | 2 (0.9)          | 2 (0.7)         | 41 (19.0)                          |
| Number with HbSS genotype (%)               | 22 (9.5)         | 1 (0.4)         | 0 (0)                              |

**Note:** SMA, severe malarial anemia; CM, cerebral malaria; IQR, interquartile range.

**Supplemental Table 2.** Association between biomarkers correlated with SCA during severe anemia with *P. falciparum* parasitemia and risk of death or readmission and risk of future outpatient visit for uncomplicated malaria.

|                                                      | N obs,<br>n event | HR   | 95% CI     | P value <sup>b</sup> | HR                             | 95% CI     | P value <sup>b</sup> |
|------------------------------------------------------|-------------------|------|------------|----------------------|--------------------------------|------------|----------------------|
| <b>Risk of Death or Readmission <sup>a</sup></b>     |                   |      |            |                      | Adjusted for age & Hb genotype |            |                      |
| Angpt-2 (pg/mL)                                      | 186, 49           | 1.45 | 0.77, 2.72 | 0.25                 | 1.48                           | 0.75, 2.92 | 0.25                 |
| TNF $\alpha$ (pg/mL)                                 | 212, 57           | 0.54 | 0.36, 0.81 | <b>0.003</b>         | 0.55                           | 0.36, 0.83 | <b>0.004</b>         |
| L-arg:ADMA ratio                                     | 165, 48           | 2.24 | 0.56, 8.91 | 0.25                 | 2.67                           | 0.64, 11.1 | 0.18                 |
| <b>Risk of Malaria Outpatient visit <sup>a</sup></b> |                   |      |            |                      | Adjusted for age & Hb genotype |            |                      |
| Angpt-2 (pg/mL)                                      | 186, 81           | 1.83 | 1.09, 3.06 | 0.02                 | 2.03                           | 1.14, 3.59 | <b>0.016</b>         |
| TNF $\alpha$ (pg/mL)                                 | 212, 88           | 1.29 | 0.81, 2.06 | 0.28                 | 1.33                           | 0.82, 2.15 | 0.25                 |
| L-arg:ADMA ratio                                     | 165, 75           | 1.44 | 0.46, 4.47 | 0.53                 | 1.77                           | 0.55, 5.72 | 0.34                 |

a. Cox regression is based on log<sub>10</sub> transformation of biomarkers, so hazard ratio is increase in outcome for each log<sub>10</sub> increase in biomarker

b. Significant p-values in bold, determined by FDR = 0.05

**Supplemental Table 3.** Number of readmission or sick visit events, including one participant who died at 1<sup>st</sup> hospital admission

|                              | Overall (N = 227) <sup>a</sup> | HbSS (N = 20) | HbAA (N = 207) |
|------------------------------|--------------------------------|---------------|----------------|
| Readmission and/or death     | 60 (26.4)                      | 8 (40.0)      | 52 (25.1)      |
| Including at admission (n=1) | 61 (26.9)                      | 8 (40.0)      | 53 (25.6)      |
| Readmission                  | 55 (24.2)                      | 7 (35.0)      | 48 (23.3)      |
| Death                        | 8 (3.5)                        | 1 (5.0)       | 7 (3.4)        |
| Including at admission (n=1) | 9 (4.0)                        | 1 (5.0)       | 8 (3.9)        |
| Malaria outpatient visit     | 90 (39.6)                      | 10 (50.0)     | 80 (38.6)      |

a. 3 participants did not have follow-up readmission/sick visit data (2 HbSS, 1 HbAA)

**Supplemental Table 4.** Baseline, steady state concentrations of inflammatory biomarkers in children with SCA enrolled in the NOHARM study at Mulago National Referral Hospital, and comparison with SCA and severe anemia with *P. falciparum* parasitemia from this study.

|                                        | HbSS, without SMA<br>(N = 206) | HbSS, with SMA<br>(N = 22) | HbAA, with SMA<br>(N = 208) | P value <sup>a,b</sup> |
|----------------------------------------|--------------------------------|----------------------------|-----------------------------|------------------------|
| Number of male patients (%)            | 95 (46.1)                      | 13 (59.1)                  | 127 (61.1)                  | 0.25                   |
| Median Age (IQR), years                | 2.2 (1.5, 3.0)                 | 4.6 (3.7, 5.7)             | 2.7 (2.0, 4.1)              | < 0.001                |
| Median C-reactive protein (IQR), mg/dL | 0.67 (0.26, 1.52)              | 25.0 (16.7, 34.5)          | 44.0 (25.2, 64.7)           | < 0.001                |
| Median Angiopoietin-2 (IQR), ng/mL     | 1.8 (1.3, 2.6)                 | 5.0 (3.6, 6.7)<br>(n = 18) | 1.7 (0.9, 2.8)              | < 0.001                |

a. Determined between children with HbSS with and without SCA by use of  $\chi^2$  for categorical data, student's t test for parametric continuous data, and Wilcoxon rank-sum test for non-parametric continuous data, as appropriate.

b. Significance determined with FDR = 0.05 correction for multiple comparisons.

**Supplemental Table 5.** Characteristics of children with and without SCA with WHO-defined SMA<sup>a</sup> and without evidence of bacteremia, helminthic infection, or HIV infection.

|                                                                                | HbSS<br>(n = 12)              | HbAA<br>(n = 138)              | P-value <sup>b, c</sup> |
|--------------------------------------------------------------------------------|-------------------------------|--------------------------------|-------------------------|
| <b>Baseline demographic and clinical characteristics</b>                       |                               |                                |                         |
| Number of male patients (%)                                                    | 6 (50)                        | 82 (59.4)                      | 0.53                    |
| Median age (IQR), years                                                        | 4.6 (3.0, 8.5)                | 2.6 (2.0, 3.9)                 | <b>0.006</b>            |
| Median admission temperature (IQR), °C                                         | 38.3 (37.2, 39.2)             | 37.7 (36.9, 38.5)              | 0.20                    |
| <b>Baseline clinical characteristics (Mean, SD)</b>                            |                               |                                |                         |
| Hemoglobin, g/dL                                                               | 3.8 (0.6)                     | 3.8 (0.9)                      | 0.96                    |
| WBC count, x10 <sup>3</sup> /μL                                                | 32.2 (16.0)                   | 13.0 (8.8)                     | <b>&lt;0.001</b>        |
| Platelet count, x10 <sup>3</sup> /μL                                           | 209 (110)                     | 163 (120)                      | 0.21                    |
| <b>Plasma markers of inflammation and endothelial activation (Median, IQR)</b> |                               |                                |                         |
| <i>Plasmodium falciparum</i> HRP-2, ng/mL                                      | 276 (50, 649)                 | 1344 (591, 3050)               | <b>&lt;0.001</b>        |
| Parasite density in peripheral blood, parasites x10 <sup>3</sup> /μL           | 117 (50.4, 277)               | 86 (32, 282)                   | 0.84                    |
| Circulating (x10 <sup>9</sup> )                                                | 1842 (739, 2640)              | 946 (377, 2500)                | 0.27                    |
| Sequestered (x10 <sup>9</sup> )                                                | 1365 (0, 5720)                | 7804 (2358, 21100)             | <b>0.01</b>             |
| Total (x10 <sup>9</sup> )                                                      | 3070 (679, 6010)              | 9850 (4320, 22200)             | <b>0.004</b>            |
| <b>Plasma markers of inflammation and endothelial activation (Median, IQR)</b> |                               |                                |                         |
| C-reactive protein, mg/dL                                                      | 25.0 (16.7, 34.5)             | 44.0 (25.2, 64.7)<br>(n = 192) | <b>0.04</b>             |
| Alpha-1 glycoprotein, mcg/mL                                                   | 1380 (1140, 1890)<br>(n = 10) | 2120 (1710, 2730)<br>(n = 114) | <b>&lt;0.001</b>        |
| Tumor Necrosis Factor (TNF)-α, pg/mL                                           | 62.2 (36.5, 77.8)<br>(n = 11) | 100 (57.0, 168)<br>(n = 130)   | <b>0.02</b>             |
| Angiopoietin-1, ng/mL                                                          | 6.65 (2.85, 7.63)<br>(n = 10) | 4.30 (1.92, 7.29)<br>(n = 118) | 0.36                    |
| Angiopoietin-2, ng/mL                                                          | 5.98 (3.65, 8.44)<br>(n = 10) | 1.62 (0.89, 2.80)<br>(n = 118) | <b>&lt;0.001</b>        |
| L-arginine, μmol/L                                                             | 20 (20, 30)<br>(n = 10)       | 30 (20, 30)<br>(n = 101)       | 0.40                    |
| Asymmetric Dimethylarginine (ADMA), μmol/L                                     | 0.89 (0.81, 1.09)             | 0.73 (0.61, 0.89)              | <b>0.006</b>            |
| L-arginine:ADMA                                                                | 24.2 (21.8, 27.5)<br>(n = 10) | 33.8 (25.6, 47.7)<br>(n = 100) | <b>0.02</b>             |

a. Hemoglobin <5 g/dL and *P. falciparum* parasitemia >10,000 parasites/microliter

b. Determined by use of  $\chi^2$ , student's t-test, or Wilcoxon rank-sum test, as appropriate.

c. Significant p-values in bold, determined by FDR = 0.05 correction for multiple comparisons.
